# Supplementary material for: The Development of a High Density Linkage Map for Black Tiger Shrimp (Penaeus monodon) Based on cSNPs
Source: PLoS One. 2014 Jan 17;9(1):e85413. doi: 10.1371/journal.pone.0085413 (PMC3894980; doi:10.1371/journal.pone.0085413)
Supplement: Dataset S4 — Allele frequency of mitochondrial DNA SNPs in Andaman Island (AI) and East Coast (EC) sampled individuals. SNP position in each contig, and in the overall mtDNA reference sequence [57] is indicated in bp. (XLSX) [file pone.0085413.s005.xlsx]

## Sheet: MergedMitDNASNPs_AlleleFreqDiff
contigID	Start position mitDNA	SNP ID	Contig length	SNP position within contig	Allele 1	Allele 2	Allele 1 frequency AI	Allele 1 frequency EC	Gene ID	SNP position on mitDNA molecule		Size of space
contig_29287	1	Pm_contig_29287_5	272	5	C	T	0	0.168	0	5		5
contig_51671	253	Pm_contig_51671_41	2746	41	A	C	0.998	0.787	cytochrome_c_oxidase_subunit_i	293		288
contig_51671	253	Pm_contig_51671_53	2746	53	A	C	0.999	0.792	cytochrome_c_oxidase_subunit_i	305		12
contig_51671	253	Pm_contig_51671_113	2746	113	A	T	0	0.219	cytochrome_c_oxidase_subunit_i	365		60
contig_51671	253	Pm_contig_51671_246	2746	246	A	G	0.001	0.145	cytochrome_c_oxidase_subunit_i	498		133
contig_51671	253	Pm_contig_51671_314	2746	314	A	G	0	0.163	cytochrome_c_oxidase_subunit_i	566		68
contig_51671	253	Pm_contig_51671_317	2746	317	C	T	0.001	0.165	cytochrome_c_oxidase_subunit_i	569		3
contig_51671	253	Pm_contig_51671_350	2746	350	A	G	0	0.208	cytochrome_c_oxidase_subunit_i	602		33
contig_51671	253	Pm_contig_51671_362	2746	362	A	G	1	0.786	cytochrome_c_oxidase_subunit_i	614		12
contig_51671	253	Pm_contig_51671_417	2746	417	A	G	1	0.79	cytochrome_c_oxidase_subunit_i	669		55
contig_51671	253	Pm_contig_51671_500	2746	500	C	T	0.999	0.857	cytochrome_c_oxidase_subunit_i	752		83
contig_51671	253	Pm_contig_51671_518	2746	518	C	T	0	0.198	cytochrome_c_oxidase_subunit_i	770		18
contig_51671	253	Pm_contig_51671_552	2746	552	A	G	1	0.778	cytochrome_c_oxidase_subunit_i	804		34
contig_51671	253	Pm_contig_51671_631	2746	631	A	G	1	0.85	cytochrome_c_oxidase_subunit_i	883		79
contig_51671	253	Pm_contig_51671_635	2746	635	A	C	0	0.188	cytochrome_c_oxidase_subunit_i	887		4
contig_51671	253	Pm_contig_51671_699	2746	699	A	G	0	0.196	cytochrome_c_oxidase_subunit_i	951		64
contig_51671	253	Pm_contig_51671_962	2746	962	C	T	0.696	0.999	cytochrome_c_oxidase_subunit_i	1214		263
contig_51671	253	Pm_contig_51671_1016	2746	1016	A	G	0	0.086	cytochrome_c_oxidase_subunit_i	1268		54
contig_51671	253	Pm_contig_51671_1043	2746	1043	A	G	1	0.845	cytochrome_c_oxidase_subunit_i	1295		27
contig_51671	253	Pm_contig_51671_1051	2746	1051	A	G	1	0.838	cytochrome_c_oxidase_subunit_i	1303		8
contig_51671	253	Pm_contig_51671_1072	2746	1072	C	T	0	0.211	cytochrome_c_oxidase_subunit_i	1324		21
contig_51671	253	Pm_contig_51671_1170	2746	1170	C	T	0	0.172	cytochrome_c_oxidase_subunit_i	1422		98
contig_51671	253	Pm_contig_51671_1259	2746	1259	C	T	0	0.162	cytochrome_c_oxidase_subunit_i	1511		89
contig_51671	253	Pm_contig_51671_1264	2746	1264	C	T	0.999	0.84	cytochrome_c_oxidase_subunit_i	1516		5
contig_51671	253	Pm_contig_51671_1285	2746	1285	A	T	1	0.859	cytochrome_c_oxidase_subunit_i	1537		21
contig_51671	253	Pm_contig_51671_1303	2746	1303	C	T	0.001	0.144	cytochrome_c_oxidase_subunit_i	1555		18
contig_51671	253	Pm_contig_51671_1726	2746	1726	G	T	0.997	0.762	cytochrome_c_oxidase_subunit_i	1978		423
contig_51671	253	Pm_contig_51671_1732	2746	1732	A	G	0.999	0.891	cytochrome_c_oxidase_subunit_i	1984		6
contig_51671	253	Pm_contig_51671_1783	2746	1783	C	T	0.999	0.812	cytochrome_c_oxidase_subunit_i	2035		51
contig_51671	253	Pm_contig_51671_1888	2746	1888	C	T	0.742	1	cytochrome_c_oxidase_subunit_i	2140		105
contig_45136	3579	Pm_contig_45136_182	343	182	A	G	0	0.216	cytochrome_c_oxidase_subunit_ii	3760		1620
contig_45136	3579	Pm_contig_45136_197	343	197	G	T	1	0.862	cytochrome_c_oxidase_subunit_ii	3775		15
contig_45136	3579	Pm_contig_45136_224	343	224	A	G	0.743	1	cytochrome_c_oxidase_subunit_ii	3802		27
contig_45136	3579	Pm_contig_45136_326	343	326	A	G	0.001	0.127	cytochrome_c_oxidase_subunit_ii	3904		102
contig_17597	3908	Pm_contig_17597_66	830	66	C	T	0.999	0.73	atp_synthase_f0_subunit_6	3973		69
contig_17597	3908	Pm_contig_17597_72	830	72	A	G	0.001	0.233	atp_synthase_f0_subunit_6	3979		6
contig_17597	3908	Pm_contig_17597_749	830	749	C	T	0	0.216	atp_synthase_f0_subunit_6	4656		677
contig_17597	3908	Pm_contig_17597_785	830	785	A	G	0	0.088	atp_synthase_f0_subunit_6	4692		36
contig_108440	5594	Pm_contig_108440_54	108	54	A	T	1	0.867	0	5647		955
contig_29117	5680	Pm_contig_29117_30	264	30	C	T	0	0.212	nadh_dehydrogenase_subunit_3	5709		62
contig_48077	6286	Pm_contig_48077_416	1749	416	C	T	0	0.183	nadh_dehydrogenase_subunit_5	6701		992
contig_48077	6286	Pm_contig_48077_500	1749	500	C	T	0.999	0.876	nadh_dehydrogenase_subunit_5	6785		84
contig_48077	6286	Pm_contig_48077_548	1749	548	C	T	0	0.162	nadh_dehydrogenase_subunit_5	6833		48
contig_48077	6286	Pm_contig_48077_593	1749	593	A	G	1	0.761	nadh_dehydrogenase_subunit_5	6878		45
contig_48077	6286	Pm_contig_48077_761	1749	761	A	G	0.999	0.89	nadh_dehydrogenase_subunit_5	7046		168
contig_48077	6286	Pm_contig_48077_788	1749	788	A	G	1	0.851	nadh_dehydrogenase_subunit_5	7073		27
contig_48077	6286	Pm_contig_48077_794	1749	794	A	G	0.999	0.84	nadh_dehydrogenase_subunit_5	7079		6
contig_48077	6286	Pm_contig_48077_839	1749	839	C	T	0	0.132	nadh_dehydrogenase_subunit_5	7124		45
contig_48077	6286	Pm_contig_48077_895	1749	895	A	G	0	0.109	nadh_dehydrogenase_subunit_5	7180		56
contig_48077	6286	Pm_contig_48077_905	1749	905	A	G	1	0.89	nadh_dehydrogenase_subunit_5	7190		10
contig_48077	6286	Pm_contig_48077_977	1749	977	A	G	0.995	0.863	nadh_dehydrogenase_subunit_5	7262		72
contig_48077	6286	Pm_contig_48077_1070	1749	1070	C	T	0	0.135	nadh_dehydrogenase_subunit_5	7355		93
contig_48077	6286	Pm_contig_48077_1082	1749	1082	C	T	0.996	0.866	nadh_dehydrogenase_subunit_5	7367		12
contig_48077	6286	Pm_contig_48077_1132	1749	1132	A	G	0.999	0.869	nadh_dehydrogenase_subunit_5	7417		50
contig_48077	6286	Pm_contig_48077_1142	1749	1142	G	T	0	0.117	nadh_dehydrogenase_subunit_5	7427		10
contig_48077	6286	Pm_contig_48077_1171	1749	1171	A	G	0.001	0.277	nadh_dehydrogenase_subunit_5	7456		29
contig_48077	6286	Pm_contig_48077_1190	1749	1190	A	G	0	0.241	nadh_dehydrogenase_subunit_5	7475		19
contig_48077	6286	Pm_contig_48077_1193	1749	1193	A	T	1	0.758	nadh_dehydrogenase_subunit_5	7478		3
contig_48077	6286	Pm_contig_48077_1337	1749	1337	A	T	0	0.136	nadh_dehydrogenase_subunit_5	7622		144
contig_48077	6286	Pm_contig_48077_1364	1749	1364	A	G	0.001	0.117	nadh_dehydrogenase_subunit_5	7649		27
contig_48077	6286	Pm_contig_48077_1367	1749	1367	A	G	1	0.883	nadh_dehydrogenase_subunit_5	7652		3
contig_48077	6286	Pm_contig_48077_1397	1749	1397	A	G	0	0.169	nadh_dehydrogenase_subunit_5	7682		30
contig_48077	6286	Pm_contig_48077_1403	1749	1403	C	T	0.999	0.846	nadh_dehydrogenase_subunit_5	7688		6
contig_48077	6286	Pm_contig_48077_1523	1749	1523	C	T	0	0.211	nadh_dehydrogenase_subunit_5	7808		120
contig_48077	6286	Pm_contig_48077_1571	1749	1571	A	G	0	0.258	nadh_dehydrogenase_subunit_5	7856		48
contig_48077	6286	Pm_contig_48077_1631	1749	1631	A	G	0	0.147	nadh_dehydrogenase_subunit_5	7916		60
contig_48077	6286	Pm_contig_48077_1685	1749	1685	A	G	1	0.837	nadh_dehydrogenase_subunit_5	7970		54
contig_48077	6286	Pm_contig_48077_1698	1749	1698	C	G	1	0.733	nadh_dehydrogenase_subunit_5	7983		13
contig_48077	6286	Pm_contig_48077_1727	1749	1727	C	T	1	0.621	nadh_dehydrogenase_subunit_5	8012		29
contig_48077	6286	Pm_contig_48077_1745	1749	1745	C	T	0	0.399	nadh_dehydrogenase_subunit_5	8030		18
contig_48077	6286	Pm_contig_48077_1750	1749	1750	A	G	1	0.727	nadh_dehydrogenase_subunit_5	8035		5
contig_48077	6286	Pm_contig_48077_1754	1749	1754	A	G	0	0.221	nadh_dehydrogenase_subunit_5	8039		4
contig_48077	6286	Pm_contig_48077_1759	1749	1759	C	T	0.261	0	nadh_dehydrogenase_subunit_5	8044		5
contig_49756	8171	Pm_contig_49756_26	1635	26	C	T	0	0.291	nadh_dehydrogenase_subunit_4	8196		152
contig_49756	8171	Pm_contig_49756_44	1635	44	C	T	1	0.834	nadh_dehydrogenase_subunit_4	8214		18
contig_49756	8171	Pm_contig_49756_76	1635	76	A	G	1	0.473	nadh_dehydrogenase_subunit_4	8246		32
contig_49756	8171	Pm_contig_49756_131	1635	131	A	G	0.999	0.723	nadh_dehydrogenase_subunit_4	8301		55
contig_49756	8171	Pm_contig_49756_134	1635	134	A	G	1	0.725	nadh_dehydrogenase_subunit_4	8304		3
contig_49756	8171	Pm_contig_49756_203	1635	203	A	G	0	0.261	nadh_dehydrogenase_subunit_4	8373		69
contig_49756	8171	Pm_contig_49756_221	1635	221	C	T	0	0.162	nadh_dehydrogenase_subunit_4	8391		18
contig_49756	8171	Pm_contig_49756_230	1635	230	G	T	1	0.872	nadh_dehydrogenase_subunit_4	8400		9
contig_49756	8171	Pm_contig_49756_293	1635	293	A	G	1	0.87	nadh_dehydrogenase_subunit_4	8463		63
contig_49756	8171	Pm_contig_49756_302	1635	302	C	T	0	0.172	nadh_dehydrogenase_subunit_4	8472		9
contig_49756	8171	Pm_contig_49756_308	1635	308	A	C	0	0.145	nadh_dehydrogenase_subunit_4	8478		6
contig_49756	8171	Pm_contig_49756_311	1635	311	A	G	0.999	0.858	nadh_dehydrogenase_subunit_4	8481		3
contig_49756	8171	Pm_contig_49756_430	1635	430	A	G	1	0.863	nadh_dehydrogenase_subunit_4	8600		119
contig_49756	8171	Pm_contig_49756_458	1635	458	C	G	0	0.12	nadh_dehydrogenase_subunit_4	8628		28
contig_49756	8171	Pm_contig_49756_467	1635	467	A	G	0	0.138	nadh_dehydrogenase_subunit_4	8637		9
contig_49756	8171	Pm_contig_49756_542	1635	542	C	T	0	0.282	nadh_dehydrogenase_subunit_4	8712		75
contig_49756	8171	Pm_contig_49756_545	1635	545	C	T	0.994	0.709	nadh_dehydrogenase_subunit_4	8715		3
contig_49756	8171	Pm_contig_49756_659	1635	659	A	G	1	0.785	nadh_dehydrogenase_subunit_4	8829		114
contig_49756	8171	Pm_contig_49756_803	1635	803	A	G	0	0.352	nadh_dehydrogenase_subunit_4	8973		144
contig_49756	8171	Pm_contig_49756_866	1635	866	A	G	0.769	0	nadh_dehydrogenase_subunit_4	9036		63
contig_49756	8171	Pm_contig_49756_1066	1635	1066	A	G	0.208	0	nadh_dehydrogenase_subunit_4	9236		200
contig_49756	8171	Pm_contig_49756_1268	1635	1268	A	G	0.174	0	nadh_dehydrogenase_subunit_4	9438		202
contig_49756	8171	Pm_contig_49756_1624	1635	1624	A	G	0.135	0	nadh_dehydrogenase_subunit_4	9794		356
contig_35613	9802	Pm_contig_35613_143	443	143	C	T	1	0.68	nadh_dehydrogenase_subunit_6	9944		150
contig_35613	9802	Pm_contig_35613_242	443	242	A	G	0.78	0.007	nadh_dehydrogenase_subunit_6	10043		99
contig_35613	9802	Pm_contig_35613_379	443	379	C	G	0	0.464	nadh_dehydrogenase_subunit_6	10180		137
contig_2040	10056	Pm_contig_2040_105	408	105	A	T	1	0.393	nadh_dehydrogenase_subunit_6	10160		-20
contig_75098	11254	Pm_contig_75098_32	356	32	C	T	0.999	0.882	cytochrome_b	11285		1125
contig_75098	11254	Pm_contig_75098_50	356	50	A	G	0.999	0.85	cytochrome_b	11303		18
contig_75098	11254	Pm_contig_75098_56	356	56	A	G	0.001	0.165	cytochrome_b	11309		6
contig_75098	11254	Pm_contig_75098_266	356	266	C	G	1	0.045	cytochrome_b	11519		210
contig_75098	11254	Pm_contig_75098_347	356	347	A	G	1	0.862	cytochrome_b	11600		81
contig_75098	11254	Pm_contig_75098_350	356	350	A	G	0	0.099	cytochrome_b	11603		3
contig_75098	11254	Pm_contig_75098_353	356	353	A	G	1	0.898	cytochrome_b	11606		3
contig_42885	11579	Pm_contig_42885_321	1126	321	C	T	0.001	0.092	nadh_dehydrogenase_subunit_1	11899		293
contig_42885	11579	Pm_contig_42885_345	1126	345	C	T	0.001	0.215	nadh_dehydrogenase_subunit_1	11923		24
contig_42885	11579	Pm_contig_42885_474	1126	474	C	T	0.999	0.814	nadh_dehydrogenase_subunit_1	12052		129
contig_42885	11579	Pm_contig_42885_503	1126	503	A	T	0	0.094	nadh_dehydrogenase_subunit_1	12081		29
contig_42885	11579	Pm_contig_42885_548	1126	548	C	T	0.999	0.843	nadh_dehydrogenase_subunit_1	12126		45
contig_42885	11579	Pm_contig_42885_554	1126	554	A	G	0	0.118	nadh_dehydrogenase_subunit_1	12132		6
contig_42885	11579	Pm_contig_42885_824	1126	824	C	T	0	0.149	nadh_dehydrogenase_subunit_1	12402		270
contig_42885	11579	Pm_contig_42885_1022	1126	1022	A	G	0.984	0.837	nadh_dehydrogenase_subunit_1	12600		198
contig_108895	12956	Pm_contig_108895_29	107	29	G	T	0.056	0	0	12984		384
contig_108895	12956	Pm_contig_108895_61	107	61	A	G	0.995	0.84	0	13016		32
contig_52592	12969	Pm_contig_52592_67	119	67	C	T	0.971	0.8	0	13035		19
contig_52592	12969	Pm_contig_52592_89	119	89	A	G	1	0.739	0	13057		22
contig_52592	12969	Pm_contig_52592_91	119	91	A	C	0.889	0.955	0	13059		2
contig_52435	13246	Pm_contig_52435_57	100	57	A	T	0.95	0.936	0	13302		243
contig_75092	13420	Pm_contig_75092_36	136	36	A	G	0.998	0.035	0	13455		153
contig_75092	13420	Pm_contig_75092_69	136	69	A	G	0.997	0.358	0	13488		33
contig_75092	13420	Pm_contig_75092_101	136	101	A	C	0	0.122	0	13520		32
contig_75092	13420	Pm_contig_75092_114	136	114	C	T	0.999	0.885	0	13533		13
contig_62620	13568	Pm_contig_62620_65	82	65	A	G	0.999	0.736	0	13632		99
contig_75093	13594	Pm_contig_75093_48	107	48	C	T	0.001	0.573	0	13641		9
contig_75093	13594	Pm_contig_75093_51	107	51	A	G	0.999	0.424	0	13644		3
contig_48331	14195	Pm_contig_48331_221	822	221	C	T	1	0.801	0	14415		771
contig_48331	14195	Pm_contig_48331_288	822	288	C	T	1	0.879	0	14482		67
contig_48331	14195	Pm_contig_48331_376	822	376	C	T	0	0.209	0	14570		88
contig_48331	14195	Pm_contig_48331_426	822	426	A	G	0	0.164	0	14620		50
contig_48331	14195	Pm_contig_48331_439	822	439	A	C	0	0.179	0	14633		13
contig_48331	14195	Pm_contig_48331_459	822	459	C	T	0.998	0.828	0	14653		20
contig_48331	14195	Pm_contig_48331_486	822	486	A	G	0	0.452	0	14680		27
contig_48331	14195	Pm_contig_48331_548	822	548	C	T	1	0.804	0	14742		62
contig_48331	14195	Pm_contig_48331_611	822	611	A	G	1	0.793	0	14805		63
contig_48331	14195	Pm_contig_48331_617	822	617	A	G	0	0.194	0	14811		6
contig_48331	14195	Pm_contig_48331_638	822	638	C	T	0	0.157	0	14832		21
contig_48331	14195	Pm_contig_48331_643	822	643	A	T	0.586	1	0	14837		5
contig_48331	14195	Pm_contig_48331_670	822	670	G	T	0	0.174	0	14864		27
contig_48331	14195	Pm_contig_48331_694	822	694	A	G	1	0.809	0	14888		24
contig_48331	14195	Pm_contig_48331_803	822	803	A	T	1	0.859	0	14997		109
contig_48331	14195	Pm_contig_48331_804	822	804	C	T	0	0.14	0	14998		1
contig_48331	14195	Pm_contig_48331_820	822	820	C	T	1	0.892	0	15014		16
												969
